# Supplementary material
Source: publisher site journal article supplement (https://www.spandidos-publications.com/466/downloadSupplementary)
Supplement: Supplementary file 1 [file downloadSupplementary]

## Sheet: Repeated_measure_ANOVA_fig.1
Table SIII
Analyte	term	df	Sum of Sq	Mean Sq	F-value	p.value
IL-1beta	Condition	4	301.047	75.2617	2.5837	0.0908377
	Residuals	12	349.553	29.1295	NA	NA
IL-1RA	Condition	4	151566	37891.6	4.11838	0.025054
	Residuals	12	110407	9200.61	NA	NA
IL-2	Condition	4	10.9237	2.73091	3.46164	0.0422086
IL-2	Residuals	12	9.4669	0.788908	NA	NA
IL-2R	Condition	4	7597.09	1899.27	0.793692	0.551513
IL-2R	Residuals	12	28715.5	2392.96	NA	NA
IL-4	Condition	4	150.875	37.7188	0.751839	0.575638
IL-4	Residuals	12	602.025	50.1687	NA	NA
IL-6	Condition	4	41.6342	10.4086	0.76655	0.568715
IL-6	Residuals	11	149.363	13.5784	NA	NA
IL-8	Condition	4	1770.91	442.727	0.773731	0.562915
IL-8	Residuals	12	6866.38	572.198	NA	NA
IL-10	Condition	3	1.18779	0.395931	15.1495	0.025667	* not significatn with Dunnett's test
IL-10	Residuals	3	0.078405	0.026135	NA	NA
IL-12	Condition	4	5654.95	1413.74	0.275622	0.888099
IL-12	Residuals	12	61551.2	5129.26	NA	NA
IL-13	Condition	4	195.562	48.8904	4.05671	0.037685
IL-13	Residuals	9	108.466	12.0517	NA	NA
IL-15	Condition	4	3906.9	976.725	1.28373	0.330106
IL-15	Residuals	12	9130.22	760.852	NA	NA
IL-17	Condition	4	30.5231	7.63077	0.22075	0.921693
IL-17	Residuals	12	414.81	34.5675	NA	NA
G-CSF	Condition	4	774.758	193.69	1.79387	0.194919	* not significant with repeated-measures ANOVA, but significant Control vs Baseline by Dunnett's test
G-CSF	Residuals	12	1295.68	107.973	NA	NA
GROa	Condition	4	10.7062	2.67655	1.75975	0.220936
GROa	Residuals	9	13.6888	1.52098	NA	NA
IFN-alpha	Condition	4	139.685	34.9212	1.31125	0.320708
IFN-alpha	Residuals	12	319.585	26.6321	NA	NA
IFN-gamma	Condition	4	181.527	45.3818	0.557587	0.697724
IFN-gamma	Residuals	12	976.675	81.3896	NA	NA
TNF-alpha	Condition	4	2.55705	0.639263	0.79315	0.55182
TNF-alpha	Residuals	12	9.67175	0.805979	NA	NA
eotaxin	Condition	4	2967.48	741.871	1.82608	0.188688
eotaxin	Residuals	12	4875.17	406.264	NA	NA
IP-10	Condition	4	374.336	93.584	0.27027	0.891495
IP-10	Residuals	12	4155.14	346.261	NA	NA
MCP-1	Condition	4	166608	41652	1.31908	0.318083
MCP-1	Residuals	12	378918	31576.5	NA	NA
MIG	Condition	4	2722.25	680.563	0.302873	0.87049
MIG	Residuals	12	26964.3	2247.02	NA	NA
MIP-1alpha	Condition	4	77.0605	19.2651	0.661971	0.630179
MIP-1alpha	Residuals	12	349.232	29.1027	NA	NA
MIP-1beta	Condition	4	10806.7	2701.67	0.697425	0.608229
MIP-1beta	Residuals	12	46485.4	3873.78	NA	NA
RANTES	Condition	4	2.63194e+06	657985	2.2682	0.122189	* not significant with repeated-measures ANOVA, but significant Control vs Baseline and Control vs Generalization by Dunnett's test
RANTES	Residuals	12	3.4811e+06	290091	NA	NA
EGF	Condition	4	2705.12	676.281	0.493799	0.740705
EGF	Residuals	12	16434.6	1369.55	NA	NA
FGF-basic	Condition	4	278.014	69.5034	1.18332	0.366872
FGF-basic	Residuals	12	704.832	58.736	NA	NA
HGF	Condition	4	1.36046e+06	340116	0.263127	0.895993
HGF	Residuals	12	1.55111e+07	1.29259e+06	NA	NA
VEGF	Condition	4	81.5971	20.3993	0.839086	0.526299
VEGF	Residuals	12	291.736	24.3113	NA	NA

## Sheet: Repeated_measure_ANOVA_fig.3
Table SIII
Analyte	term	df	sumsq	meansq	statistic	p.value
IL-1beta	Condition	4	289.737	72.4343	2.35565	0.112421
IL-1beta	Residuals	12	368.991	30.7492	NA	NA
IL-1RA	Condition	4	125718	31429.5	2.70051	0.0816291	* not significant with repeated-measures ANOVA, but significant Control vs AJCC Stage II at Baseline by Dunnett's test
IL-1RA	Residuals	12	139660	11638.3	NA	NA
IL-2	Condition	4	10.432	2.60799	3.14269	0.0552251	* not significant with repeated-measures ANOVA, but significant Control vs AJCC Stage I at 1 Month by Dunnett's test
IL-2	Residuals	12	9.95831	0.829859	NA	NA
IL-2R	Condition	4	16418.3	4104.57	1.51381	0.25963
IL-2R	Residuals	12	32537	2711.41	NA	NA
IL-4	Condition	4	121.494	30.3735	0.550561	0.702406
IL-4	Residuals	12	662.02	55.1683	NA	NA
IL-6	Condition	6	138.381	23.0636	2.64596	0.0918513
IL-6	Residuals	9	78.4487	8.71652	NA	NA
IL-8	Condition	5	4180.49	836.098	1.26257	0.345824
IL-8	Residuals	11	7284.38	662.217	NA	NA
IL-12	Condition	4	4009.62	1002.4	0.193169	0.937306
IL-12	Residuals	12	62271.2	5189.27	NA	NA
IL-13	Condition	7	182.159	26.0227	1.28727	0.387072	* not significant with repeated-measures ANOVA, but significant Control vs AJCC Stage I at Baseline and 1 Month by Dunnett's test
IL-13	Residuals	6	121.292	20.2153	NA	NA
IL-15	Condition	4	1313.23	328.309	0.347521	0.840768
IL-15	Residuals	12	11336.6	944.717	NA	NA
IL-17	Condition	5	66.5947	13.3189	0.378427	0.853319
IL-17	Residuals	11	387.151	35.1955	NA	NA
G-CSF	Condition	4	646.388	161.597	1.34895	0.308284
G-CSF	Residuals	12	1437.54	119.795	NA	NA
GROa	Condition	5	10.2112	2.04223	1.13966	0.421215
GROa	Residuals	7	12.5438	1.79196	NA	NA
IFN-alpha	Condition	4	232.475	58.1188	2.38054	0.109803	* not significant with repeated-measures ANOVA, but significant Control vs AJCC Stage II at 1 Month and 3 Months by Dunnett's test
IFN-alpha	Residuals	12	292.969	24.4141	NA	NA
IFN-gamma	Condition	4	235.526	58.8816	0.676242	0.621278
IFN-gamma	Residuals	12	1044.86	87.0719	NA	NA
TNF-alpha	Condition	4	2.00088	0.500221	0.584283	0.680074
TNF-alpha	Residuals	12	10.2735	0.856127	NA	NA
eotaxin	Condition	4	289.299	72.3247	0.0974213	0.981304
eotaxin	Residuals	12	8908.69	742.391	NA	NA
IP-10	Condition	4	429.229	107.307	0.305173	0.868982
IP-10	Residuals	12	4219.53	351.628	NA	NA
MCP-1	Condition	4	87721.2	21930.3	0.560028	0.696101
MCP-1	Residuals	12	469912	39159.3	NA	NA
MIG	Condition	4	14594.4	3648.61	2.79989	0.074625
MIG	Residuals	12	15637.5	1303.13	NA	NA
MIP-1alpha	Condition	4	64.3709	16.0927	0.528336	0.717308
MIP-1alpha	Residuals	12	365.511	30.4592	NA	NA
MIP-1beta	Condition	4	11697.4	2924.34	0.807277	0.543863
MIP-1beta	Residuals	12	43469.8	3622.48	NA	NA
RANTES	Condition	4	2.69711e+06	674276	2.18109	0.132881	* not significant with repeated-measures ANOVA, but significant Control vs AJCC Stage III at Baseline and vs AJCC Stage II at 3 Months by Dunnett's test
RANTES	Residuals	12	3.70976e+06	309147	NA	NA
EGF	Condition	4	7175.5	1793.87	1.57493	0.243739
EGF	Residuals	12	13668.2	1139.02	NA	NA
FGF-basic	Condition	4	292.083	73.0208	1.25743	0.339352
FGF-basic	Residuals	12	696.857	58.0714	NA	NA
HGF	Condition	4	5.80666e+06	1.45166e+06	0.833047	0.529596
HGF	Residuals	12	2.09111e+07	1.7426e+06	NA	NA
VEGF	Condition	4	134.3	33.5749	1.49769	0.264006
VEGF	Residuals	12	269.013	22.4178	NA	NA
